# Supplementary material for: Nanosensor for the detection of eosin yellow and its photocatalytic degradation using phytosynthesized cerium oxide nanoparticles
Source: Royal Society of Chemistry journal article supplement (doi:10.1039/d4ra08231a), 2025-01-01
Supplement: d4ra08231a1.pdf [file d4ra08231a1.pdf]

## **Nanosensor for the Detection of Eosin Yellow and its Photocatalytic Degradation Using Phytosynthesized Cerium Oxide Nanoparticles**

Muhammad Usman Sadiq<sup>1,2</sup>, Afzal Shah<sup>1\*</sup>, Anum Zahid<sup>3</sup>, Adeela Javaid<sup>2</sup>, Faiza Jan Iftikhar<sup>4</sup>

<sup>1</sup>Department of Chemistry, Quaid-i-Azam University, Islamabad, 45320, Pakistan

<sup>2</sup>Department of Chemistry, The University of Azad Jammu and Kashmir, Muzaffarabad, 13100, Pakistan

<sup>3</sup>Department of Chemistry, Pir Mehr Ali Shah Arid Agriculture University, Rawalpindi, 46000, Pakistan

<sup>4</sup>National University of Technology (NUTECH), Islamabad 44000, Pakistan

\*Correspondence: [afzals\\_qau@yahoo.com](mailto:afzals_qau@yahoo.com) (Afzal Shah)

**Table S1.** Parameters of EIS obtained from Nyquist plots of bare and COOH-*f*MWCNTs/GCE

|                                | $R_s$ ( $\Omega$ ) | $R_{ct}$ ( $\Omega$ ) | $Z_w$ ( $Ss^{1/2}$ ) | $C_{dl}$ (F) | $\alpha$ |
|--------------------------------|--------------------|-----------------------|----------------------|--------------|----------|
| <b>Bare GCE</b>                | 118.2              | 6.28E+03              | 135.9E-06            | 2.19E-06     | 0.79     |
| <b>COOH-<i>f</i>MWCNTs/GCE</b> | 120.3              | 1.04E+03              | 171.9E-06            | 3.11E-06     | 0.88     |

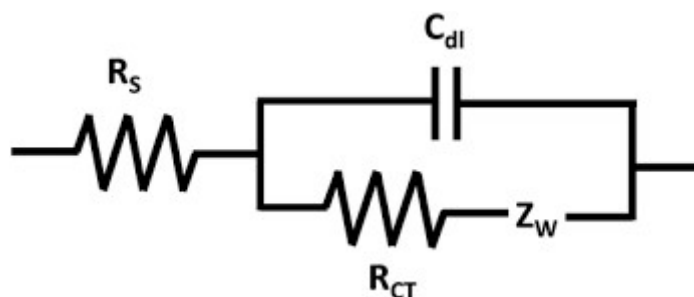

**Figure S1.** Randle's equivalent circuit used for the calculation of parameters from electrochemical impedance spectra.

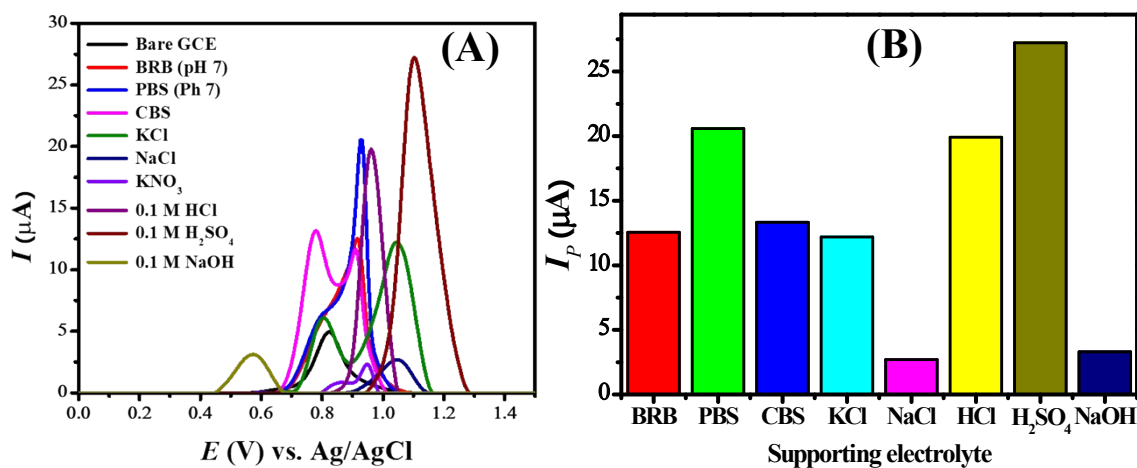

**Figure S2.** (A) SWV of 100  $\mu M$  EY in different supporting electrolytes (B) bar graph showing peak current versus supporting electrolyte.

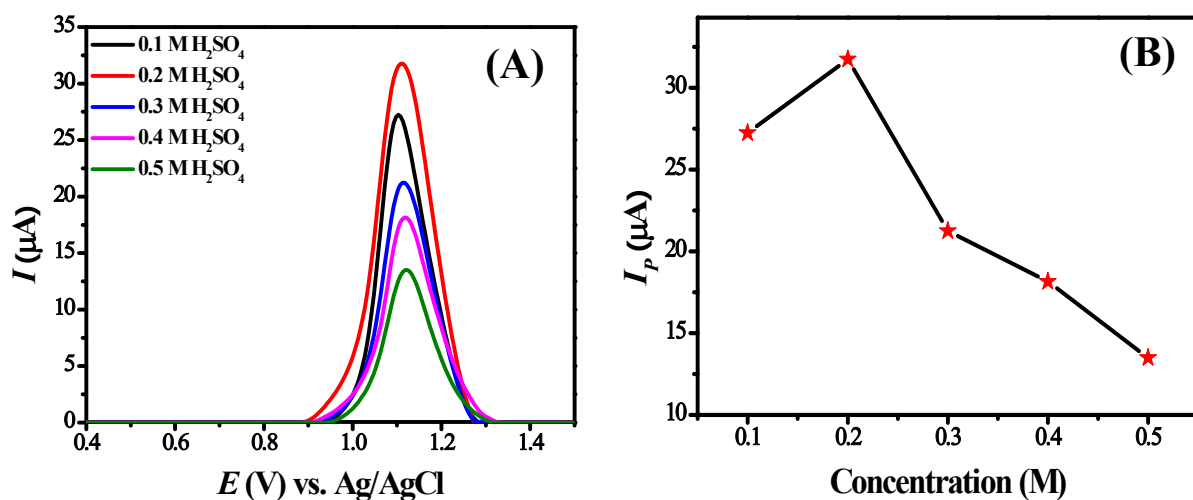

**Figure S3.** (A) Influence of concentration of H<sub>2</sub>SO<sub>4</sub> on peak current of 100 μM EY and (B) plot showing peak current versus concentration of H<sub>2</sub>SO<sub>4</sub>.

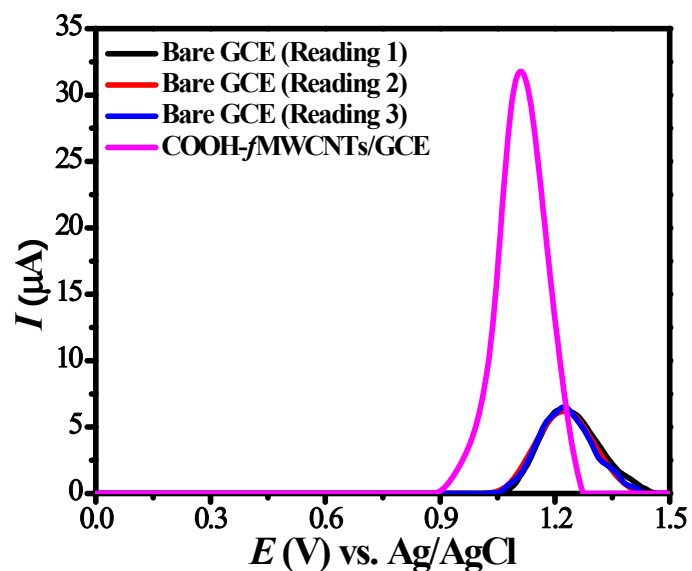

**Figure S4.** SWV response of EY at bare GCEs and COOH-fMWCNTs using 0.2 M H<sub>2</sub>SO<sub>4</sub> as supporting electrolyte.

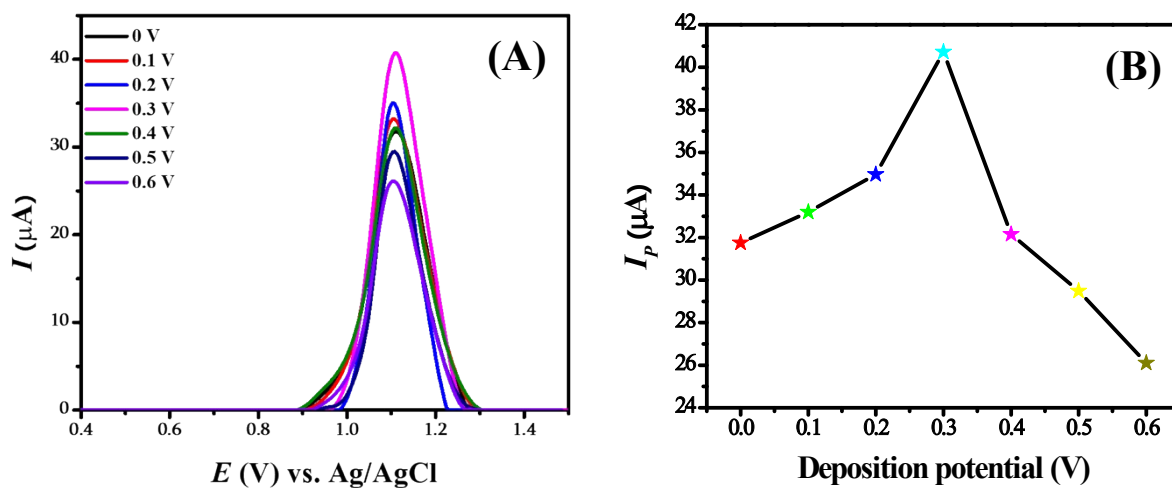

**Figure S5.** (A) SWV of 100  $\mu\text{M}$  EY under various applied deposition potential and (B) plot of peak current versus deposition potential.

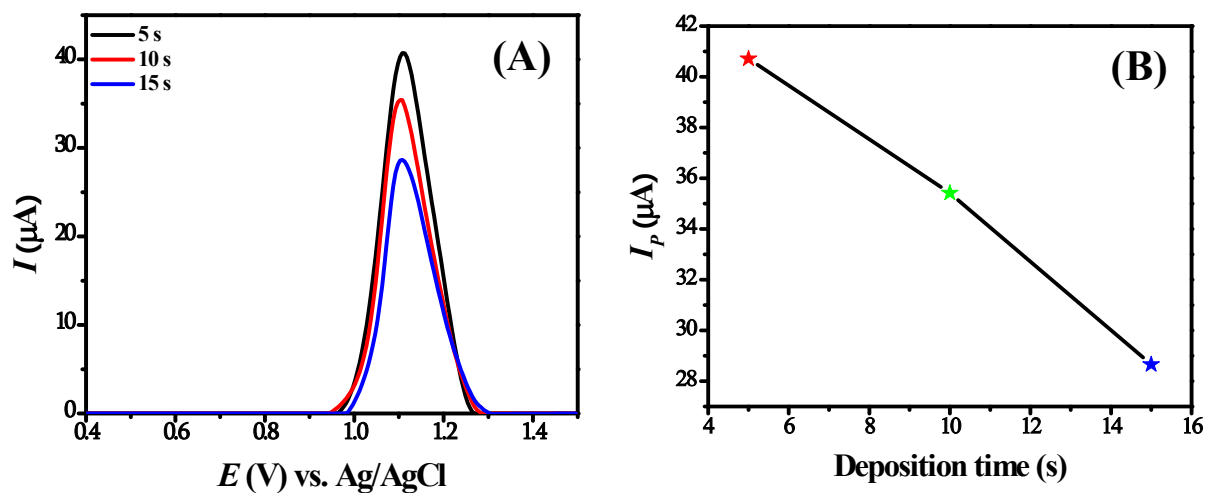

**Figure S6.** (A) Impact of deposition time on the peak intensity of EY using COOH/fMWCNTs/GCE and (B) Plot of  $I_p$  ( $\mu\text{A}$ ) versus deposition time.

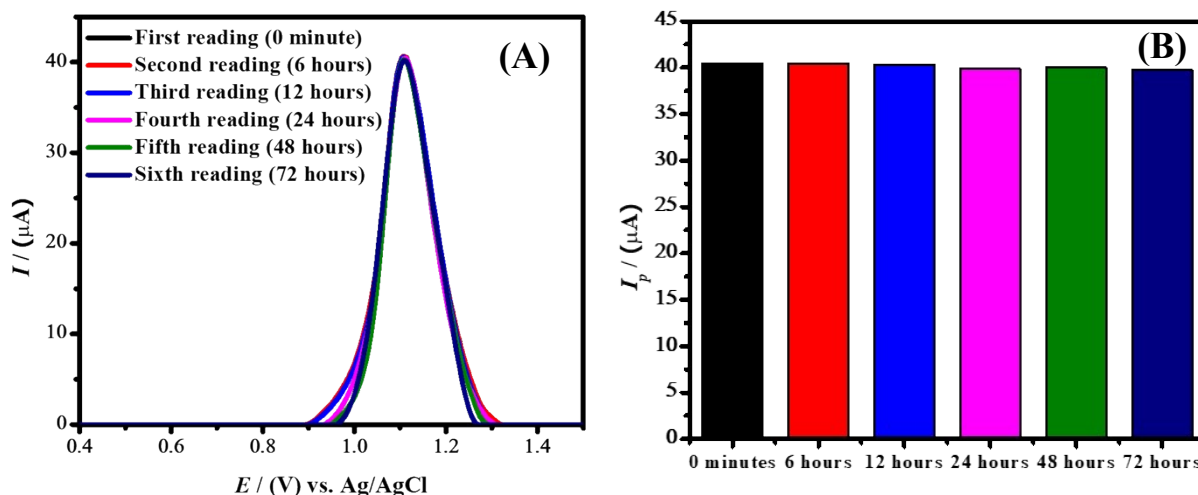

**Figure S7.** (A) SWV of 100  $\mu\text{M}$  EY recorded under optimized conditions after various time period (B) bar graph showing peak current response of 100  $\mu\text{M}$  EY.

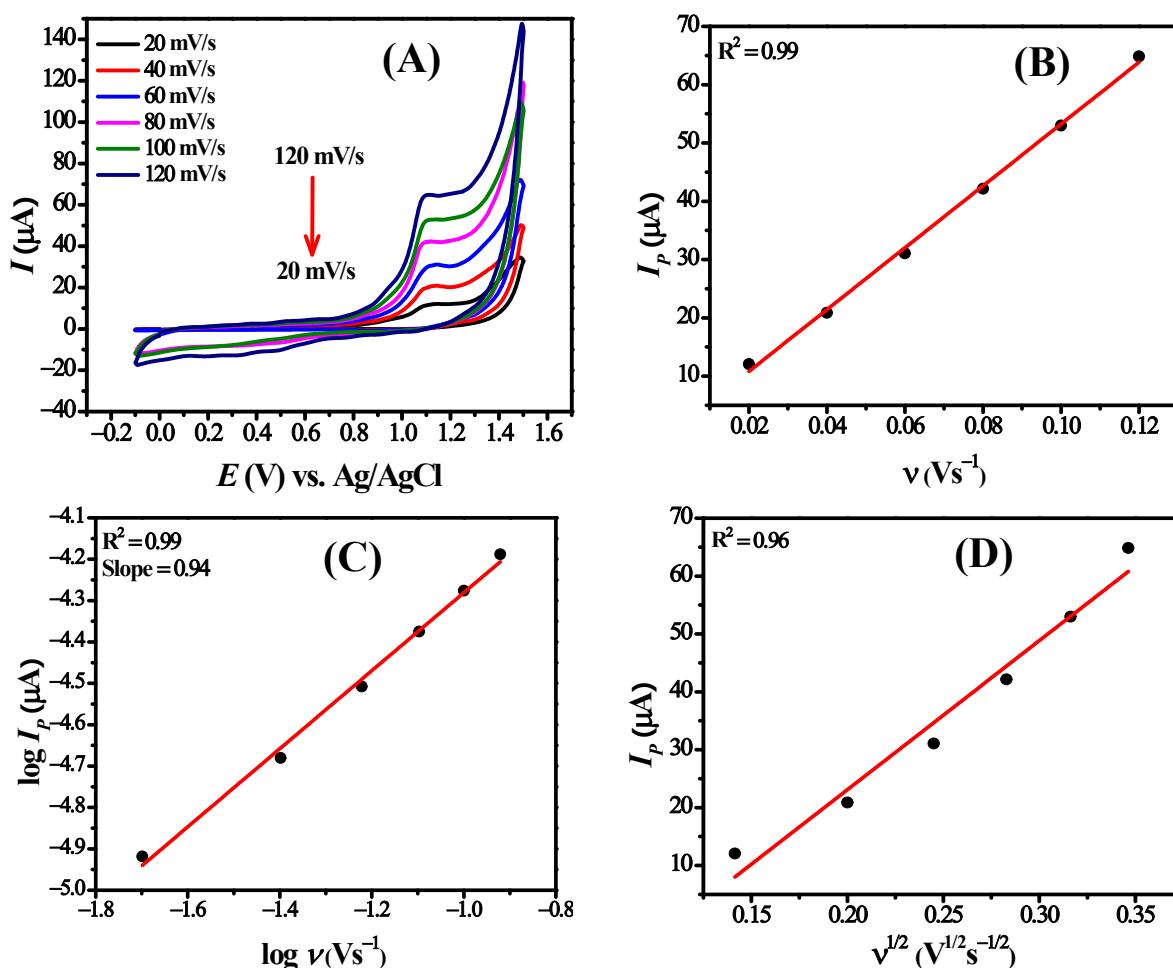

**Figure S8.** (A) Effect of various scan rates on the anodic peak current of EY in supporting electrolyte of 0.2 M  $\text{H}_2\text{SO}_4$ ; (B) Plot between  $I_p$  vs.  $v$ ; (C)  $\log I_p$  vs.  $\log v$ , and (D) Peak current vs. square root of scan rate.

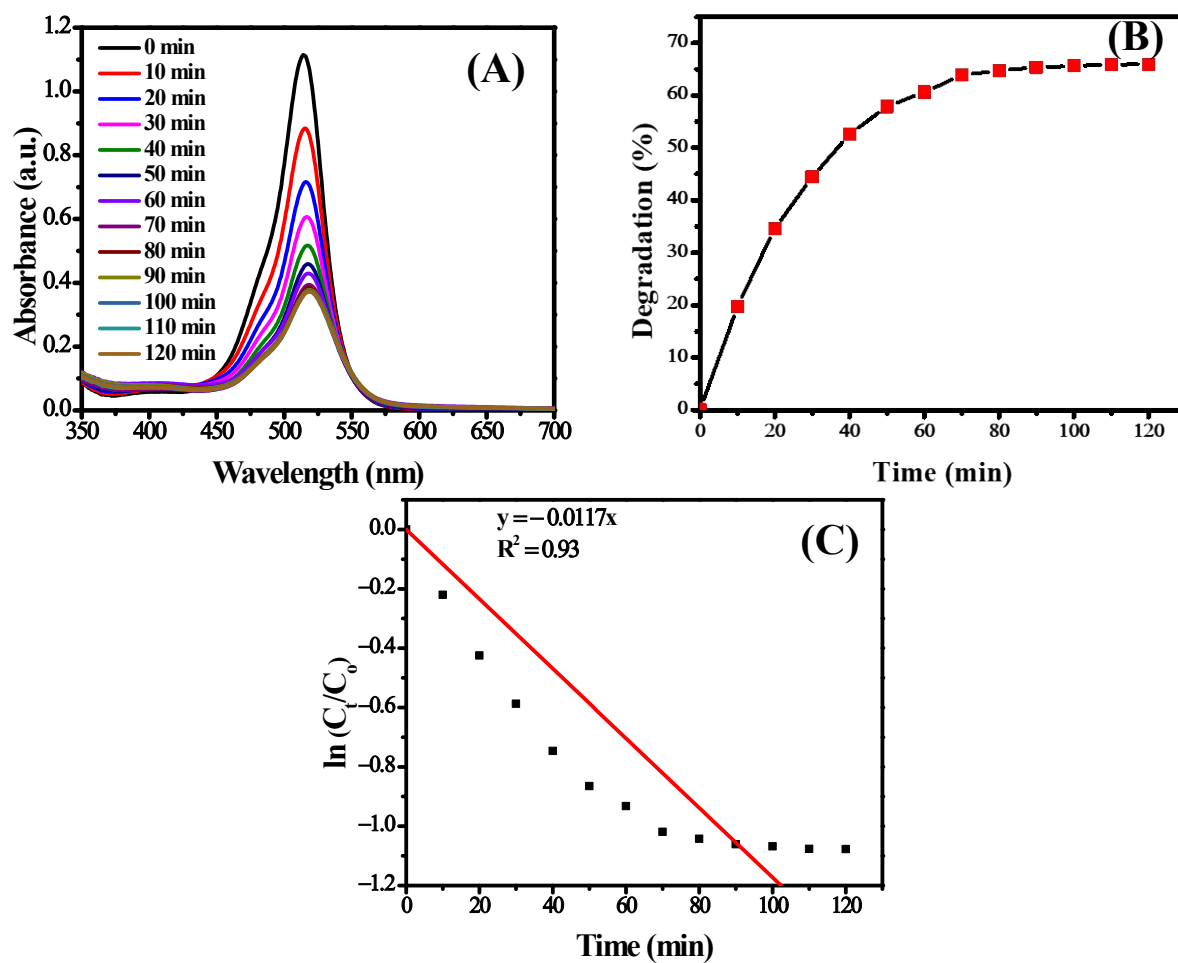

**Figure S9.** (A) Absorption spectra showing degradation of EY with time using 2 mg dose of CeO<sub>2</sub> NPs under pH 7 media, (B) plot showing extent of absorption with time, and (C) pseudo-first order kinetic plot of EY degradation.

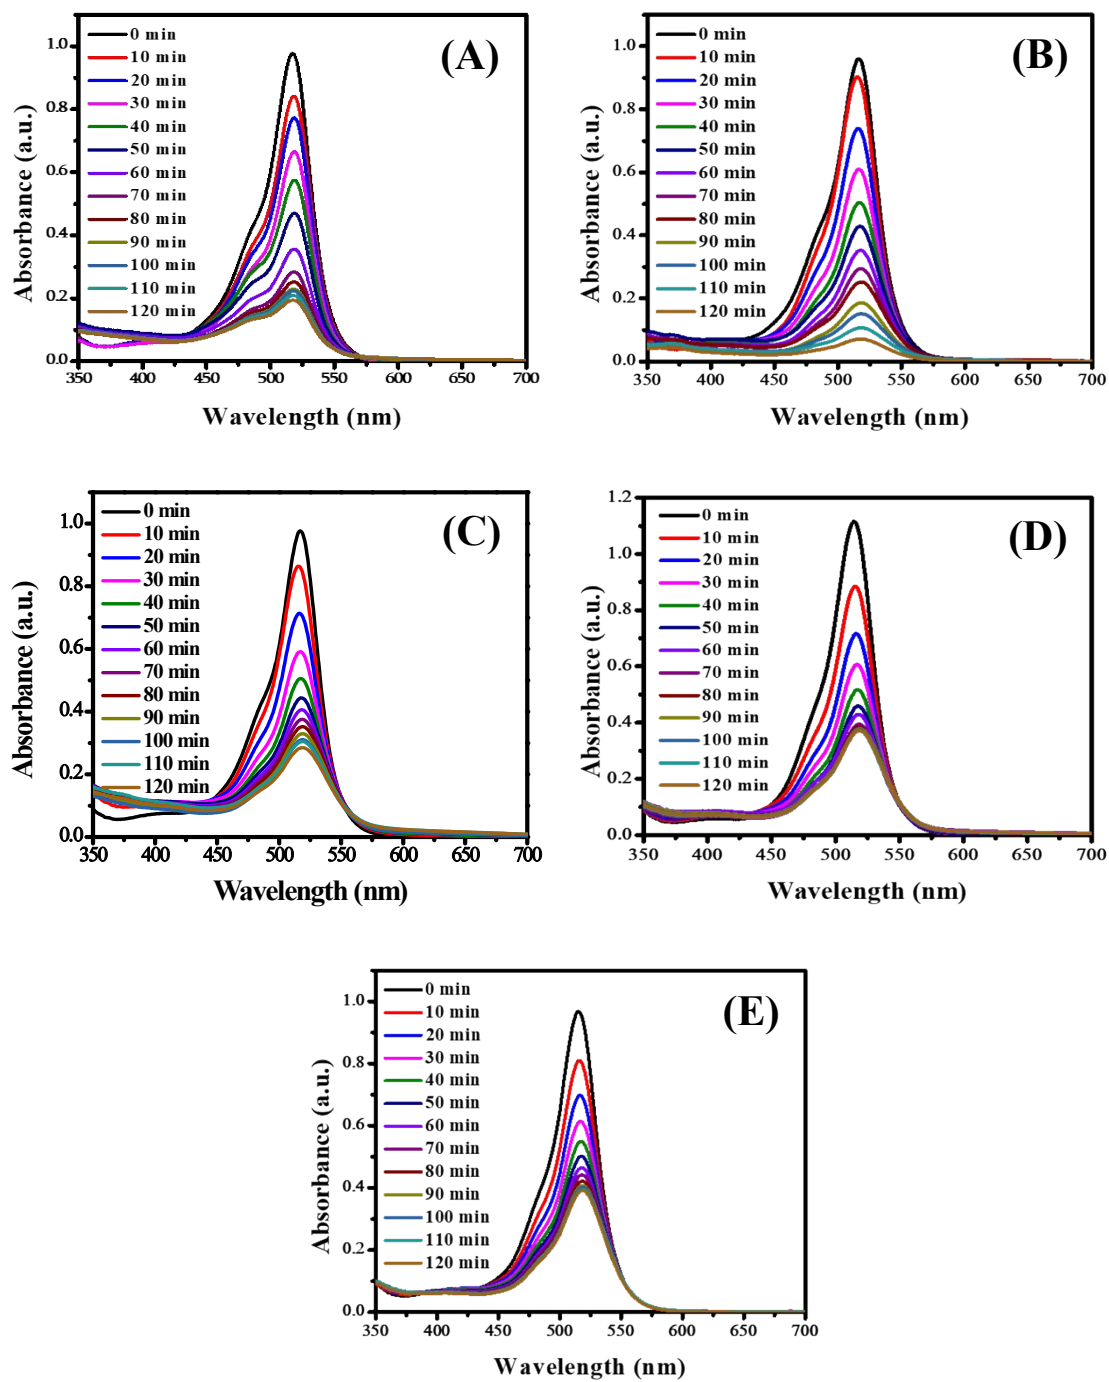

**Figure S10.** UV-visible spectra showing photocatalytic degradation of EY in solutions of various pH levels: (A) pH 4, (B) pH 5, (C) pH 6, (D) pH 7, and (E) pH 8.

**Table S2.** Rate constants of the photocatalytic degradation of EY at different pH.

| pH | Rate constant (min <sup>-1</sup> ) |
|----|------------------------------------|
| 4  | 0.0149                             |
| 5  | 0.0188                             |
| 6  | 0.0125                             |
| 7  | 0.0117                             |
| 8  | 0.0094                             |

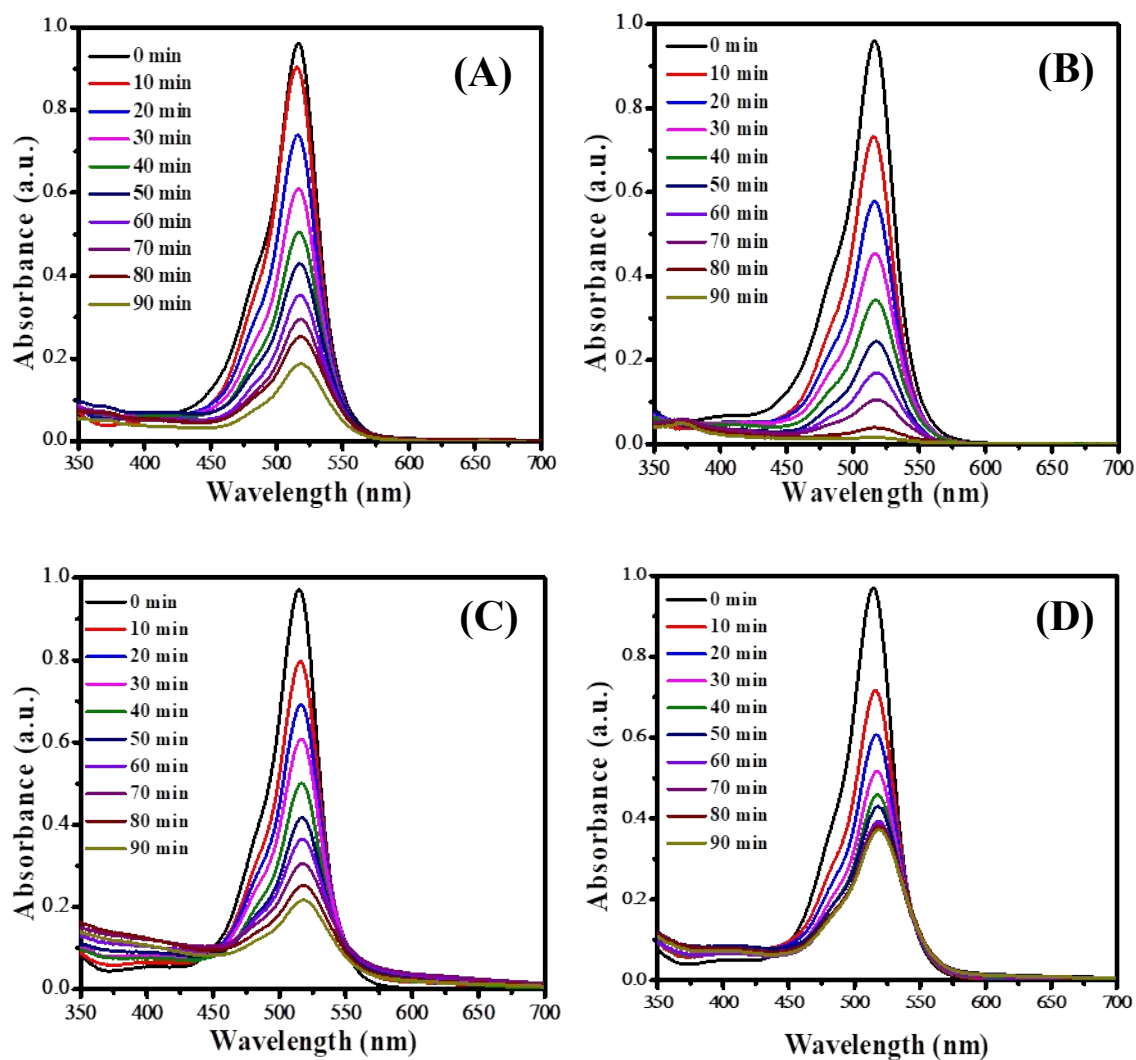

**Figure S11.** Photocatalytic degradation of EY conducted using varying doses of CeO<sub>2</sub> nanoparticles, specifically (A) 2 mg, (B) 5 mg, (C) 7 mg, and (D) 10 mg, in an environment with a pH of 5.



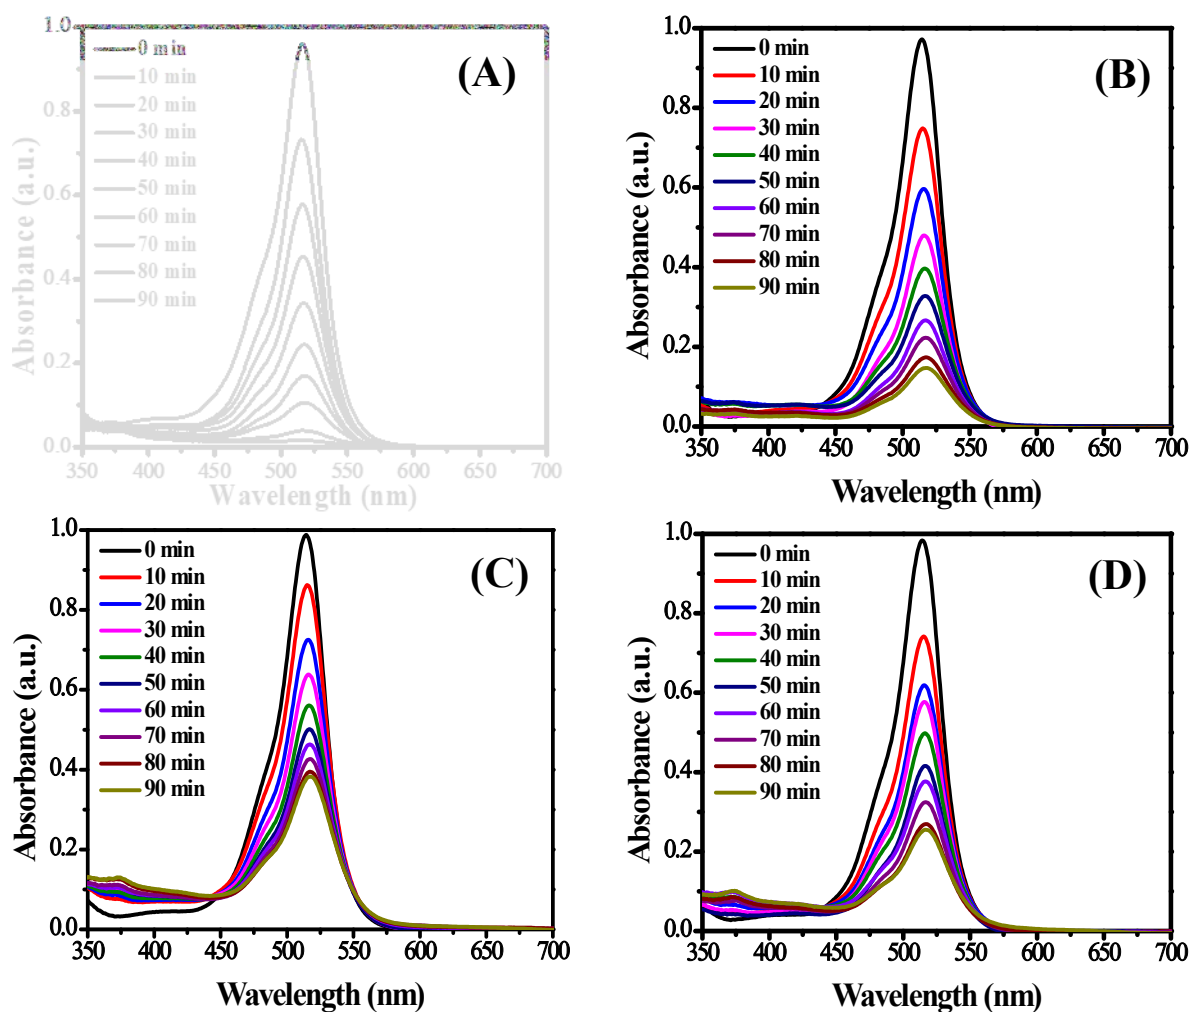

**Figure S12.** Photodegradation of EY using CeO<sub>2</sub> NPs (A) without free radical scavenger, (B) with ascorbic acid, (C) with EDTA, and (D) with methanol.

**Table S3.** Rate constants of photocatalytic degradation of EY with and without free radical scavengers.

| Scavenger     | Rate constant (min <sup>-1</sup> ) |
|---------------|------------------------------------|
| No scavenger  | 0.0360                             |
| Ascorbic acid | 0.022                              |
| EDTA          | 0.0121                             |
| Methanol      | 0.0161                             |
